# Supplementary material for: Are caves enough to represent karst groundwater biodiversity? Insights from geospatial analyses applied to European obligate groundwater-dwelling copepods
Source: PeerJ. 2025 Nov 6;13:e20285. doi: 10.7717/peerj.20285 (PMC12596886; doi:10.7717/peerj.20285)
Supplement: Supplemental Information 2 [file peerj-13-20285-s002.xlsx]

## Sheet: HSs. species list
Table S2. List of species that triggered the identification of hotspot macroareas, for both karst and cave hotspots.
Species	Cantabria - Pyrenees Mountains - Hérault Massif (Spain, France)		Jura Massif (France)		Island Sardinia (Italy)		Central Apennines (peninsular Italy)		Eastern Alps-Lessinian Prealps- Dinarides (Italy, Slovenia, Croatia to Albania)		Carpathian Mountains (Slovakia, Romania)		Balkan Mountains (Serbia, Bulgaria)
	Karst	Cave	Karst	Cave	Karst	Cave	Karst	Cave	Karst	Cave	Karst	Cave	Karst	Cave
Acanthocyclops agamus							x
Acanthocyclops balcanicus balcanicus													x	x
Acanthocyclops balcanicus bisaetosus											x	x
Acanthocyclops cf. agamus	x
Acanthocyclops chappuisi													x	x
Acanthocyclops deminutus											x	x
Acanthocyclops gordani									x	x
Acanthocyclops hispanicus	x	x
Acanthocyclops hypogeus									x	x
Acanthocyclops iskrecensis													x	x
Acanthocyclops kieferi									x	x	x	x
Acanthocyclops milotai											x	x	x	x
Acanthocyclops plesai											x	x
Acanthocyclops propinquus											x	x	x	x
Acanthocyclops radevi													x	x
Acanthocyclops reductus													x	x
Acanthocyclops rhenanus	x	x
Acanthocyclops sp.A					x	x
Acanthocyclops sp. group venustus	x		x	x					x	x	x	x
Acanthocyclops stammeri stammeri									x	x
Acanthocyclops stammeri westfalicus	x	x
Acanthocyclops strimonis													x	x
Acanthocyclops stygius											x	x	x	x
Acanthocyclops transylvanicus											x	x
Acanthocyclops troglophilus									x	x
Antrocamptus catharinae	x	x
Antrocamptus chappuisi	x
Antrocamptus coiffaiti	x	x
Attheyella (Attheyella) sp.J1	x	x	x	x
Bryocamptus (Arcticocamptus) sp.I1									x	x
Bryocamptus (Echinocamptus) dacicus									x	x	x	x	x
Bryocamptus (Rheocamptus) aquaeductus													x
Bryocamptus (Rheocamptus) balcanicus	x	x							x	x
Bryocamptus (Rheocamptus) borus									x	x			x	x
Bryocamptus (Rheocamptus) dentatus	x	x					x		x
Bryocamptus (Rheocamptus) pyrenaicus	x	x							x	x
Bryocamptus (Rheocamptus) unisaetosus	x	x	x	x					x	x	x	x		x
Bryocamptus sp.J1			x	x
Bryocamptus sp.S1	x	x
Ceuthonectes gallicus	x	x	x	x
Ceuthonectes haemusi													x	x
Ceuthonectes hungaricus											x	x
Ceuthonectes pescei					x	x
Ceuthonectes petkovskii									x	x
Ceuthonectes rouchi									x	x
Ceuthonectes serbicus			x	x					x	x	x	x	x	x
Ceuthonectes sp.J1	x	x
Ceuthonectes sp.S1	x	x
Ceuthonectes sp.S2	x	x
Cottarellicaris gallicus	x	x
Diacyclops belgicus	x	x	x	x					x	x	x	x
Diacyclops cf. tantalus									x	x
Diacyclops charon									x	x
Diacyclops clandestinus	x	x	x	x					x	x	x	x	x	x
Diacyclops cosanus					x	x	x	x	x	x
Diacyclops disjunctus	x	x									x	x
Diacyclops fontinalis													x	x
Diacyclops goticus									x	x
Diacyclops haemusi													x	x
Diacyclops hypnicola													x	x
Diacyclops italianus									x	x
Diacyclops karamani									x	x
Diacyclops maggii									x
Diacyclops paolae	x	x			x	x			x
Diacyclops slovenicus									x	x
Diacyclops sp.A									x	x
Diacyclops sp.B									x	x
Diacyclops sp.C									x	x
Diacyclops sp.D									x	x
Diacyclops sp.I1									x
Diacyclops sp.I2									x
Diacyclops sp.I3									x
Diacyclops sp.I4									x
Diacyclops sp.S1	x	x
Diacyclops tantalus									x	x
Diacyclops zschokkei			x	x					x	x	x	x
Ectinosomatidae gen. I1 sp. I1									x
Elaphoidella boui	x	x
Elaphoidella bouilloni	x
Elaphoidella brehieri	x	x
Elaphoidella brevicaudata	x
Elaphoidella brevipes									x	x
Elaphoidella bulgarica													x	x
Elaphoidella cavatica			x	x
Elaphoidella cavernicola													x	x
Elaphoidella charon									x	x
Elaphoidella claudboui	x
Elaphoidella coiffati	x	x
Elaphoidella cvetkae									x	x
Elaphoidella damianae									x	x
Elaphoidella elaphoides elaphoides							x		x	x	x	x	x	x
Elaphoidella elegantula													x	x
Elaphoidella fonticola													x
Elaphoidella franci									x	x
Elaphoidella gordani									x	x
Elaphoidella infernalis	x	x
Elaphoidella iskrecensis													x	x
Elaphoidella janas					x	x
Elaphoidella jeanneli									x	x	x	x
Elaphoidella karamani latifurcata													x	x
Elaphoidella karstica									x	x
Elaphoidella leruthi leruthi	x
Elaphoidella leruthi meridionalis	x	x
Elaphoidella longifurcata	x	x
Elaphoidella mabelae							x
Elaphoidella mauro	x	x
Elaphoidella millennii									x
Elaphoidella montenegrina									x	x
Elaphoidella necessaria													x
Elaphoidella pandurskyi													x	x
Elaphoidella parapostolovi													x	x
Elaphoidella phreatica			x	x					x	x	x	x	x	x
Elaphoidella pseudophreatica									x	x
Elaphoidella putealis											x	x
Elaphoidella pyrenaica	x
Elaphoidella reducta	x	x
Elaphoidella romanica													x	x
Elaphoidella ruffoi									x	x
Elaphoidella serbica													x	x
Elaphoidella sp.A									x	x
Elaphoidella sp.B									x	x
Elaphoidella sp.I1									x	x
Elaphoidella sp.K1									x
Elaphoidella sp.S3	x	x
Elaphoidella stammeri									x	x
Elaphoidella stygia													x	x
Elaphoidella tarmani									x
Elaphoidella tenera													x
Elaphoidella vasconica	x	x
Eucyclops (Mrazekicyclops) inarmatus									x	x
Eucyclops (Subterrocyclops) graeteri			x	x					x	x
Eucyclops (Subterrocyclops) subterraneus intermedius													x	x
Eudiaptomus cf. intermedius							x	x
Fontinalicaris fontinalis fontinalis			x	x
Gelyella droguei	x
Gelyella monardi			x
Graeteriella (Graeteriella) boui	x	x
Graeteriella (Graeteriella) brehmi	x	x
Graeteriella (Graeteriella) unisetigera	x	x	x	x					x	x	x	x
Graeteriella (Paragraeteriella) bertrandi	x	x
Graeteriella (Paragraeteriella) vandeli	x	x
Horstkurtcaris nolli alpina									x	x
Horstkurtcaris nolli nolli									x
Italicocaris italica									x	x
Kieferella delamarei	x	x
Lessinocamptus caoduroi									x	x
Lessinocamptus insoletus									x	x
Lessinocamptus pivai									x	x
Lessinocamptus sp.A									x	x
Lessinocamptus sp.I1									x	x
Lessinocamptus sp.I2									x	x
Lessinocamptus sp.SLO1									x	x
Maraenobiotus brucei carpathicus									x		x	x	x	x
Maraenobiotus sp.1							x	x
Megacyclops brachypus			x	x
Megacyclops sp.A									x	x
Metacyclops gasparoi									x	x
Metacyclops stammeri									x	x
Metacyclops trisetosus					x	x			x	x
Michelicaris micheli	x	x
Monchenkocyclops biarticulataus	x	x	x	x
Moraria (Moraria) catalana	x	x
Moraria (Moraria) jana									x	x
Moraria (Moraria) mrazeki macedonica									x	x
Moraria (Moraria) sp.I1									x	x
Moraria (Moraria) sp.J1			x	x
Moraria (Moraria) sp.S1	x
Moraria (Moraria) sp.SLO1									x	x
Moraria (Moraria) stankovitchi							x	x	x	x			x	x
Moraria sp.1							x	x
Morariopsis dumonti									x
Morariopsis kieferi									x	x
Morariopsis scotenophila									x	x
Nitocrella beatricis					x	x
Nitocrella delayi	x	x
Nitocrella gr. hirta sp.F1	x	x
Nitocrella gr. hirta sp.F2	x
Nitocrella gracilis	x	x
Nitocrella hirta hirta									x	x			x	x
Nitocrella kunzi							x
Nitocrella longa									x	x
Nitocrella neutra													x
Nitocrella omega	x	x
Nitocrella pescei							x
Nitocrella psammophila							x	x	x	x
Nitocrella sp.I1							x
Nitocrella sp.J1			x
Nitocrella stammeri							x	x
Nitocrella vasconica	x	x
Nitocrellopsis elegans	x	x
Nitocrellopsis intermedia													x
Paramorariopsis anae									x	x
Paramorariopsis sp.I1									x	x
Parapseudoleptomesochra italica							x		x				x	x
Parapseudoleptomesochra subterranea deminuta	x	x
Parapseudoleptomesochra subterranea ssp.	x	x
Parapseudoleptomesochra subterranea subterranea	x												x
Parastenocaris andreji									x	x
Parastenocaris aquaeducta											x
Parastenocaris balcanica									x	x
Parastenocaris curvicauda													x	x
Parastenocaris dentulata	x	x
Parastenocaris dianae	x	x
Parastenocaris federici									x	x
Parastenocaris gertrudae									x	x
Parastenocaris glareola			x	x
Parastenocaris jeanneli													x	x
Parastenocaris karamani karamani													x
Parastenocaris narentina									x	x
Parastenocaris ranae									x	x
Parastenocaris serbica													x	x
Parastenocaris similis macedonica									x	x
Parastenocaris sp.I1									x
Parastenocaris sp.I3									x
Parastenocaris sp.I4									x	x
Parastenocaris sp.J2			x
Parastenocaris sp.ROM1											x	x
Parastenocaris sp.ROM2											x	x
Parastenocaris sp.ROM3											x	x
Parastenocaris triphyda					x	x
Parastenocaris vicesima dalmatina									x	x
Pesceus gasparoi									x	x
Phyllognathopus inexspectatus							x
Proserpinicaris cantabrica	x	x
Proserpinicaris mangini	x	x
Proserpinicaris phyllura	x	x
Pseudectinosoma reductum							x
Pseudectinosoma sp.I1							x
Pseudectinosoma vandeli	x	x
Schizopera sp.I1					x
Simplicaris lethaea							x
Spelaeocamptus incertus									x	x
Spelaeocamptus spelaeus											x	x	x	x
Spelaeodiaptomus rouchi	x
Speocyclops anomalus	x	x
Speocyclops arregladensis	x	x
Speocyclops cantabricus	x	x
Speocyclops castereti	x	x
Speocyclops cf. proserpinae			x	x
Speocyclops fontinalis			x
Speocyclops gallicus	x	x
Speocyclops infernus									x	x			x	x
Speocyclops italicus							x
Speocyclops lindbergi													x	x
Speocyclops orcinus	x	x
Speocyclops plutonis													x	x
Speocyclops proserpinae													x	x
Speocyclops racovitzai boscensis	x	x	x	x
Speocyclops racovitzai guillounensis	x	x
Speocyclops racovitzai liquensis	x	x
Speocyclops racovitzai noustensis	x	x
Speocyclops racovitzai peyortensis	x	x
Speocyclops racovitzai racovitzai	x	x
Speocyclops racovitzai sabartensis	x	x
Speocyclops racovitzai sandetsi	x	x
Speocyclops racovitzai ssp.	x	x
Speocyclops rhodopensis														x
Speocyclops sardus					x	x
Speocyclops sebastianus	x	x
Speocyclops sisyphus	x	x
Speocyclops sp.1							x	x
Speocyclops sp.A									x	x
Speocyclops sp.B									x	x
Speocyclops sp. group demetiensis									x				x	x
Speocyclops sp.J1			x	x
Speocyclops sp.J2			x	x
Speocyclops sp.J3			x	x
Speocyclops sp.J4			x
Speocyclops sp.SL1									x
Speocyclops spelaeus	x	x
Speocyclops troglodytes									x		x	x	x	x
Stammericaris amyclaea							x
Stammericaris lorenzae							x	x
Stammericaris orcina							x
Stammericaris phreatica											x	x	x
Stammericaris stammeri	x	x
Stygepactophanes jurassicus			x
Stygepactophanes occitanus	x
Stygepactophanes sp.SLO2									x	x
Stygocyclops teras										x
Stygodiaptomus kieferi									x	x
Stygodiaptomus petkovskii									x	x
Stygonitocrella dubia	x	x
Troglodiaptomus sketi									x	x
